# Supplementary material for: Quantifying absolute addressability in DNA origami with molecular resolution
Source: Springer Nature journal article supplement (doi:10.1038/s41467-018-04031-z), 2018-04-17
Supplement: MOESM1 [file 41467_2018_4031_MOESM1_ESM.pdf]

# Supplementary Information

## Quantifying Absolute Addressability in DNA origami with Molecular Resolution

Maximilian T. Strauss, Florian Schueder, Daniel Haas, Philipp C. Nickels, and Ralf Jungmann

|                                |                                                                           |
|--------------------------------|---------------------------------------------------------------------------|
| <b>Supplementary Figure 1</b>  | 20-nm DNA origami grid structure                                          |
| <b>Supplementary Figure 2</b>  | caDNAno overview of the rectangular origami structure                     |
| <b>Supplementary Figure 3</b>  | Overview of alignment procedure                                           |
| <b>Supplementary Figure 4</b>  | Interface of analysis software                                            |
| <b>Supplementary Figure 5</b>  | Overview image for Fig. 2                                                 |
| <b>Supplementary Figure 6</b>  | Influence of Magnesium in folding buffer on staple detection              |
| <b>Supplementary Figure 7</b>  | Influence of storage conditions on detection values                       |
| <b>Supplementary Figure 8</b>  | 'Arrow'-shaped DNA origami grid with 10 binding sites used in Fig. 3c     |
| <b>Supplementary Figure 9</b>  | Overview of DNA-PAINT images used for quantification in Fig. 3d           |
| <b>Supplementary Figure 10</b> | Overview of DNA-PAINT images used for quantification in Fig. 3d           |
| <b>Supplementary Figure 11</b> | Overview of 18 DNA origami structures used for the heatmap in Fig. 4      |
| <b>Supplementary Figure 12</b> | Overview of DNA-PAINT images used for quantification in Fig. 4, Dataset 1 |
| <b>Supplementary Figure 13</b> | Overview of DNA-PAINT images used for quantification in Fig. 4, Dataset 2 |
| <b>Supplementary Figure 14</b> | Detection and incorporation heatmap                                       |
| <b>Supplementary Figure 15</b> | CanDo simulation of RMS fluctuations                                      |
| <b>Supplementary Figure 16</b> | Scaffold and staple detection experiments                                 |
| <b>Supplementary Table 1</b>   | Fit of Michaelis-Menten saturation curve                                  |
| <b>Supplementary Table 2</b>   | Overview of related studies and their incorporation values                |
| <b>Supplementary Table 3</b>   | Super-resolution data properties                                          |
| <b>Supplementary Table 4</b>   | Imaging conditions                                                        |
| <b>Supplementary Table 5</b>   | Used DNA-PAINT sequences                                                  |
| <b>Supplementary Table 6</b>   | List of core staples                                                      |
| <b>Supplementary Table 7</b>   | List of biotinylated staples                                              |

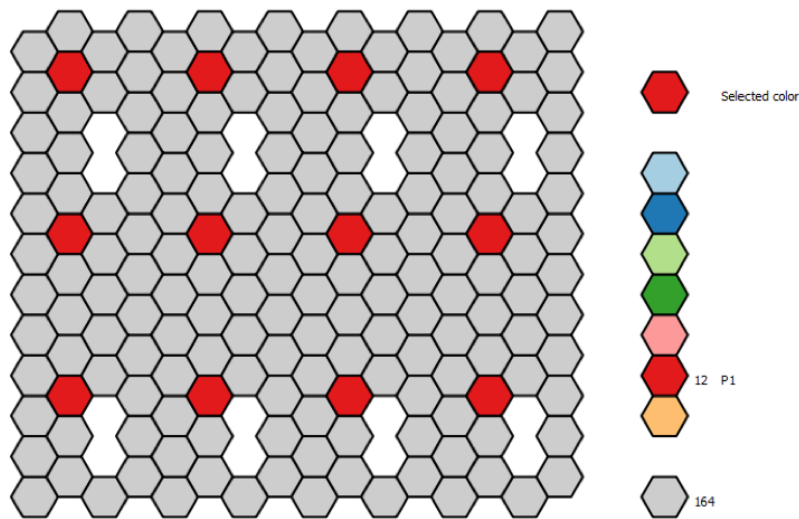

**Supplementary Figure 1 | 20-nm DNA origami grid structure.** Each hexagon represents a single staple, colored hexagons indicate a single staple extension at the 3'-end for DNA-PAINT probing.

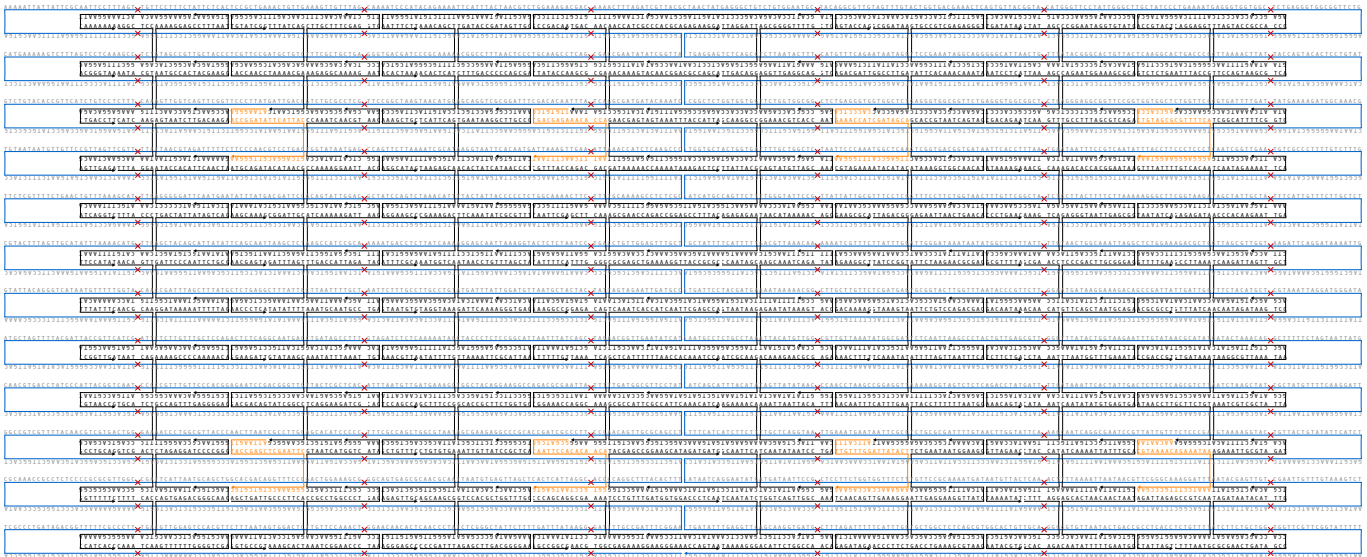

**Supplementary Figure 2 | caDNAo overview of the rectangular origami structure.** Blue: scaffold, black: unmodified staples, orange: biotinylated staples. For strand modification details see Supplementary Table 6.

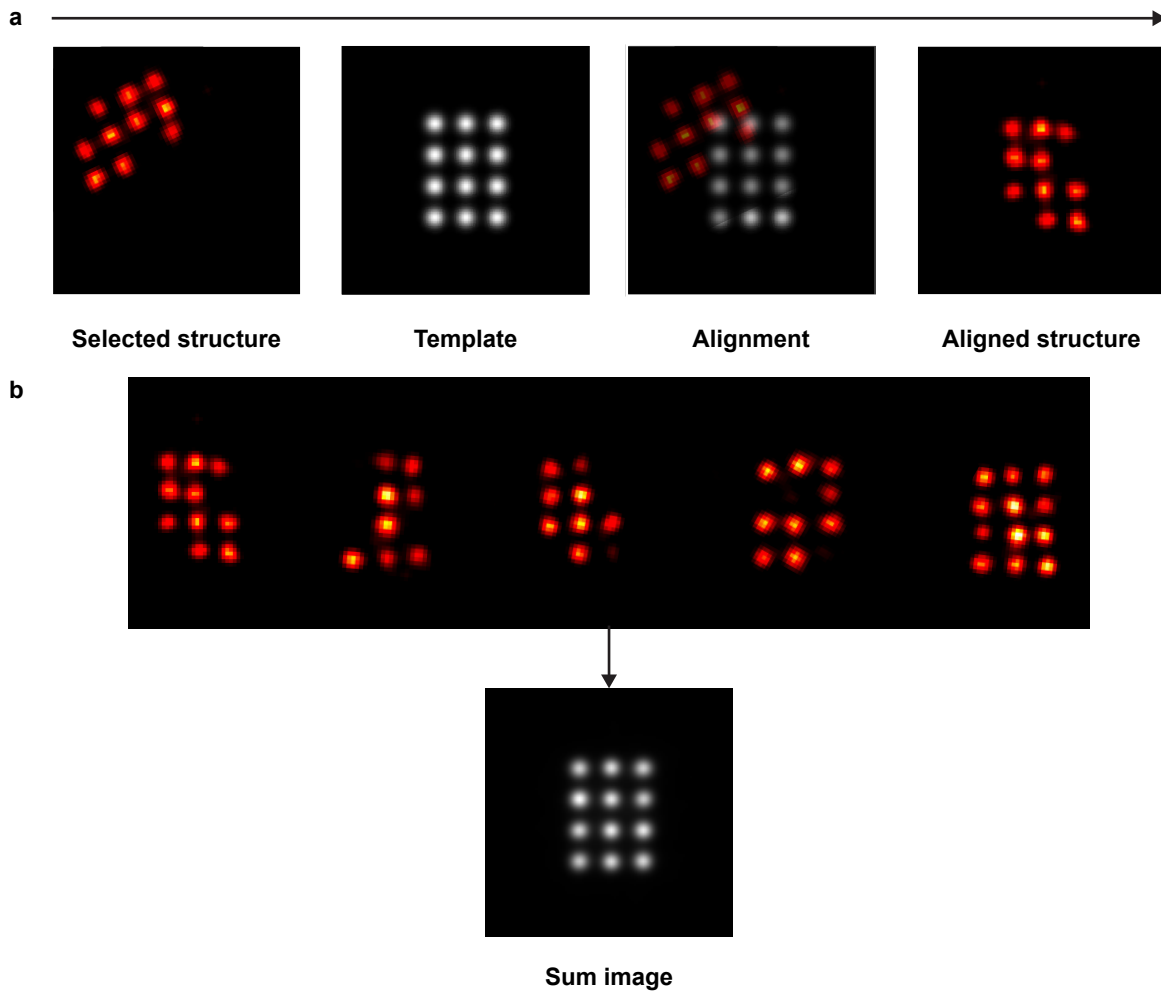

**Supplementary Figure 3 | Overview of alignment procedure.** **a**, DNA origami nanostructures are selected from the reconstructed DNA-PAINT super-resolution image. All selected structures are randomly orientated. A template is generated from the structure design. The selected structure is rotated stepwise and cross-correlated to the template. By selecting the angle where the correlation is maximised, the correct rotation angle can be obtained. The localisation data is rotated by the determined angle and corresponding shift, and the structure is aligned. **b**, Several aligned structures are stacked on top of each other to create a sum image which can be used for detection analysis.

a

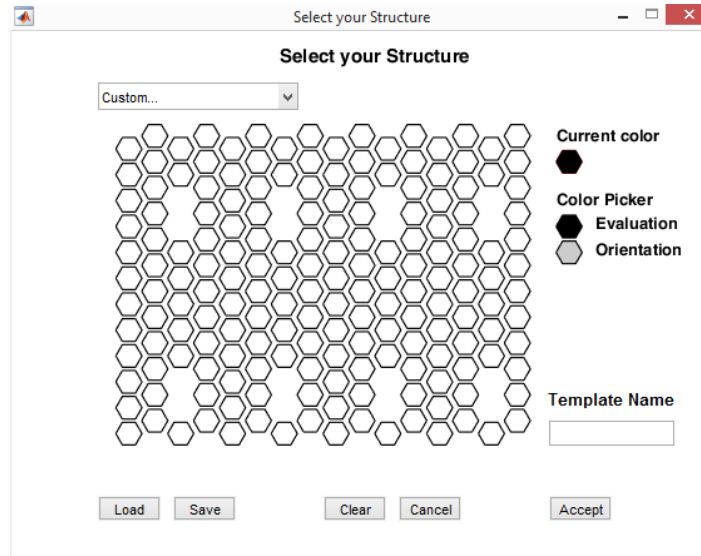

b

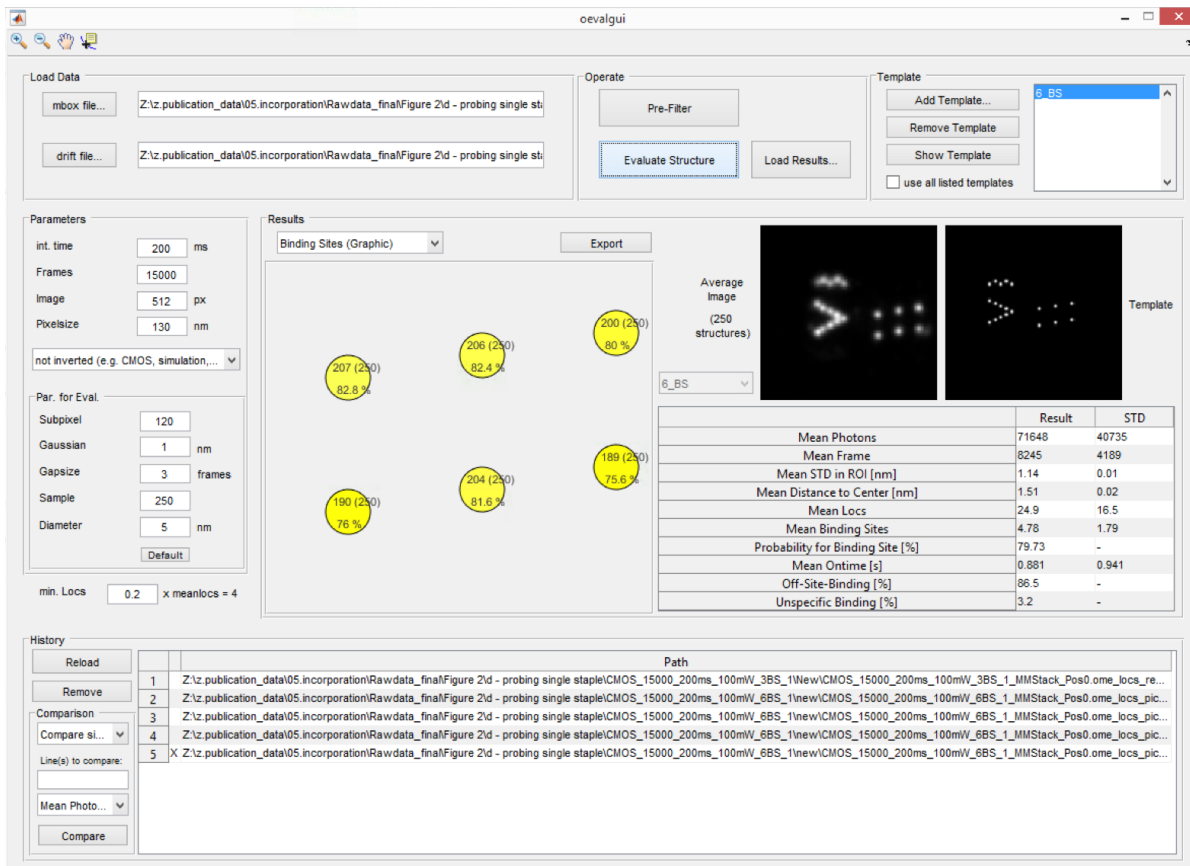

**Supplementary Figure 4 | Interface of analysis software.** a, Structure selection dialog. The analysis software features an interface where a structural template for the rectangular origami can be defined by clicking on hexagons. The software distinguishes between evaluation handles which will be evaluated and orientation handles which will be used in the template generation for the cross-correlation but not in the evaluation b, Main window. The main window features a display of the template, the sum image and detection statistics for the loaded dataset. Parameters for cross-correlation and thresholding can be set.

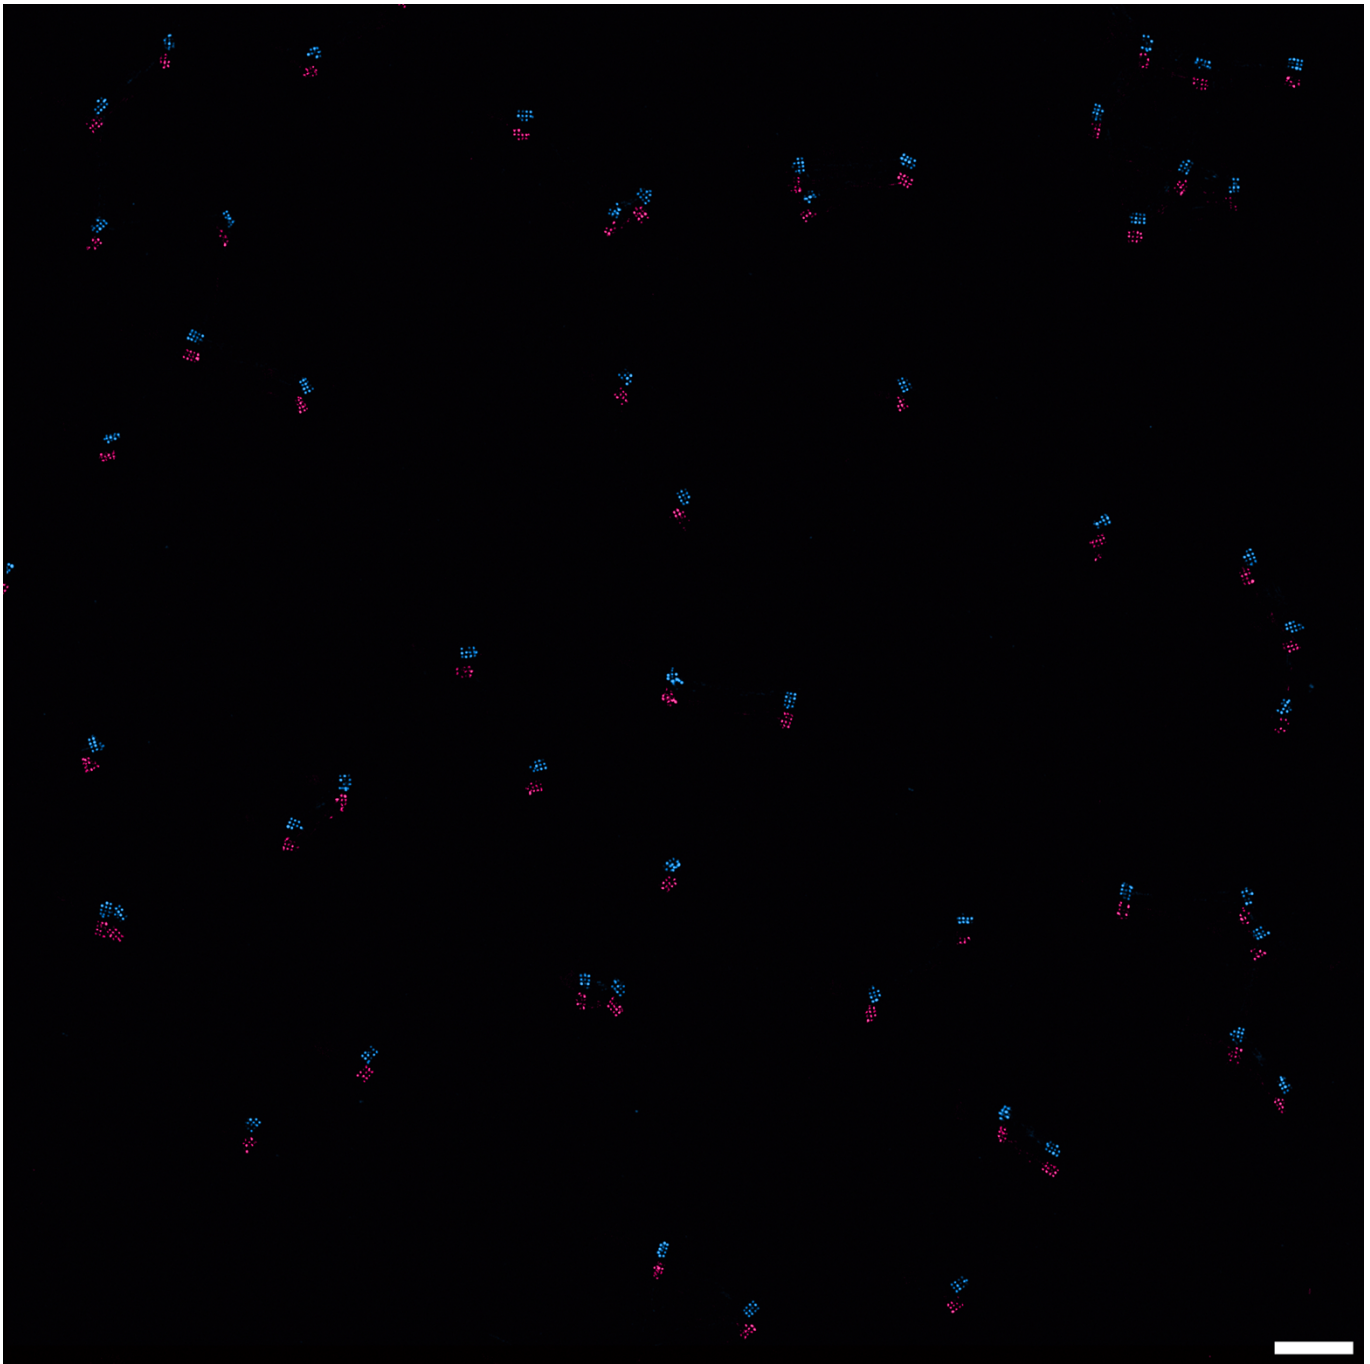

**Supplementary Figure 5 | Overview image for Fig. 2.** The two channels, red (Atto647N - 3') and blue (Cy3b - 5') are shifted to each other to allow better identification. Scale bar, 500 nm.

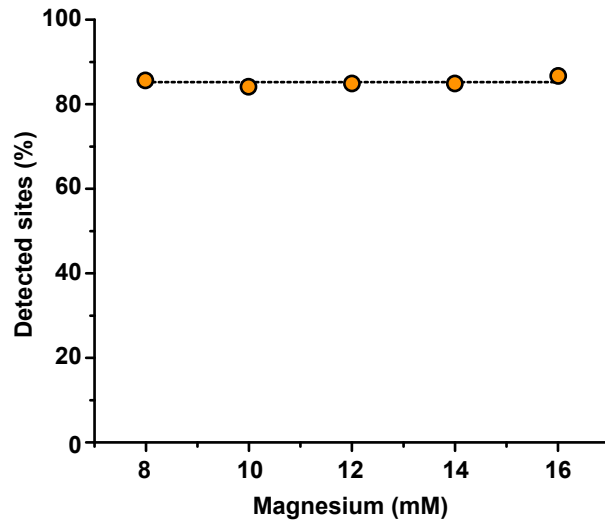

**Supplementary Figure 6 | Influence of Magnesium in folding buffer on staple detection.** DNA origami structures were folded at different Magnesium concentrations with a 3h folding ramp (60 to 4 °C). Modified staples had a 100× excess over Scaffold. Average detection (dashed line): 85.2%

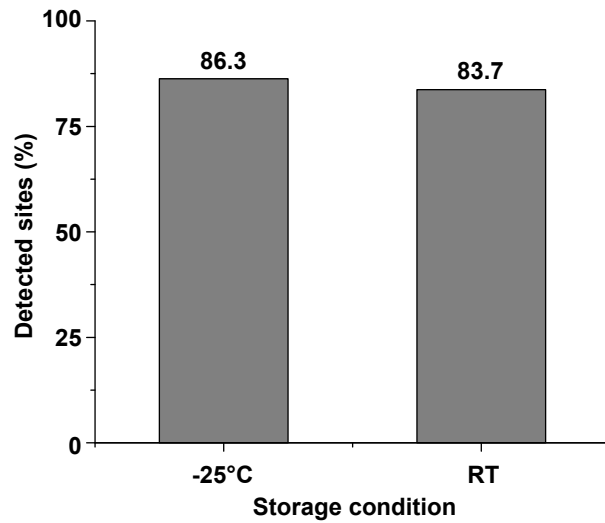

**Supplementary Figure 7 | Influence of storage conditions on detection values.** DNA origami structures were folded, PEG-purified and kept at room temperature and -25 °C for 58 days.

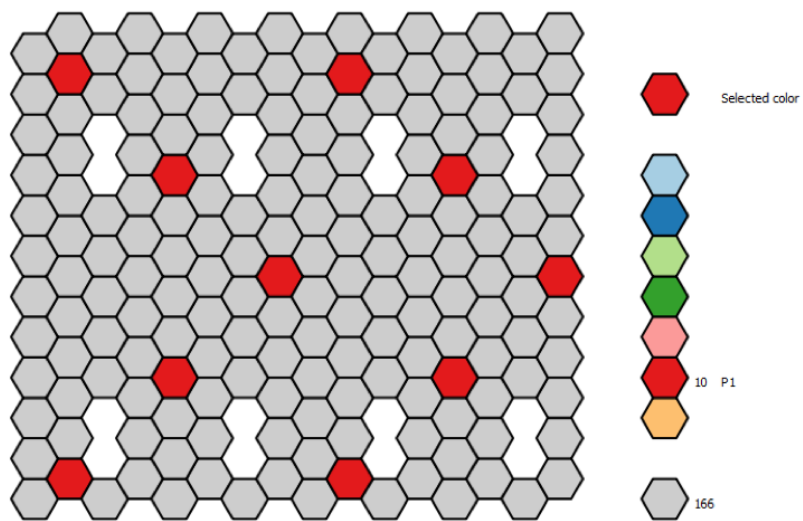

**Supplementary Figure 8 | 'Arrow'-shaped DNA origami grid with 10 binding sites used in Fig. 3c** Each hexagon represents a single staple, colored hexagons indicate a single staple extension at the 3'-end for DNA-PAINT probing.

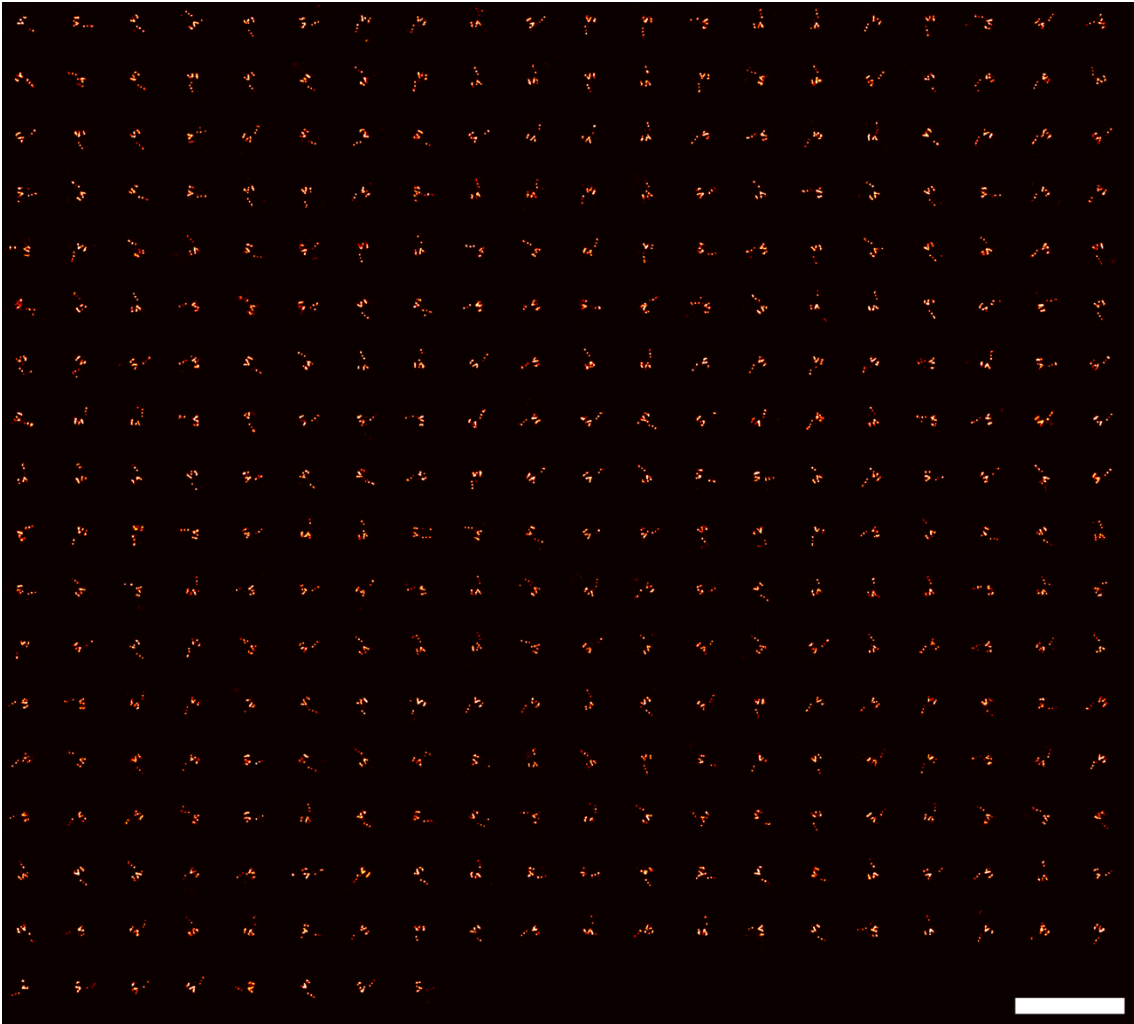

**Supplementary Figure 9 | Overview of DNA-PAINT images used for quantification in Fig. 3d. 348 3BS structures are shown.**  
Scale bar, 500 nm



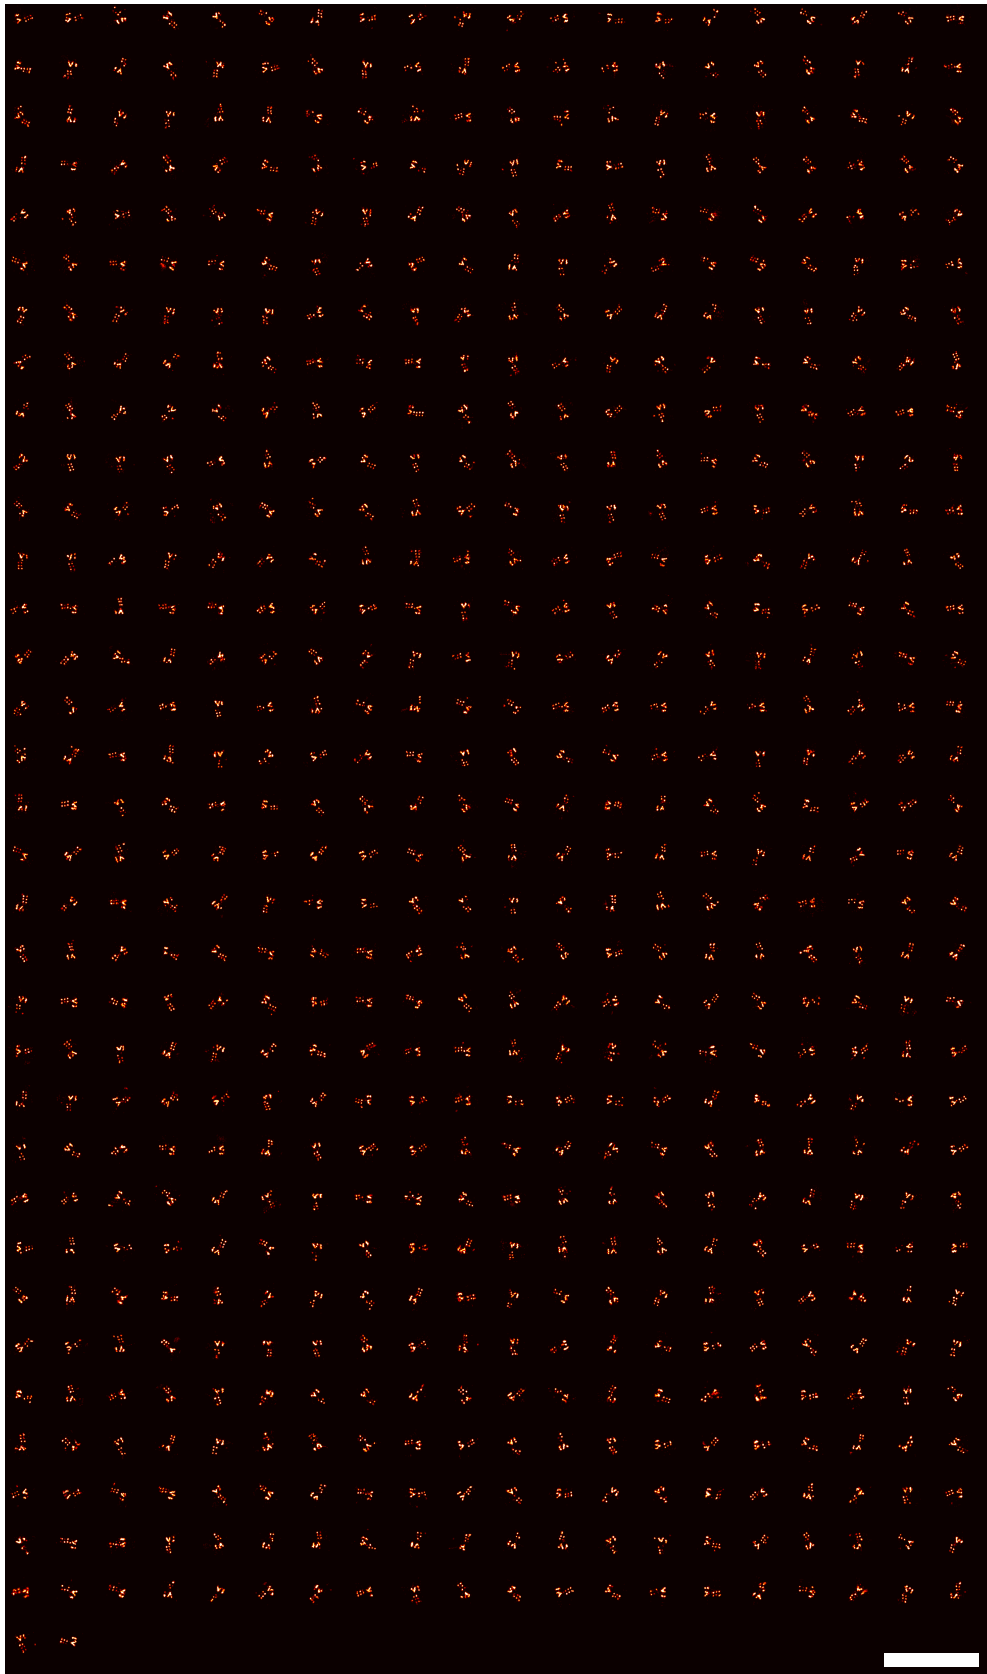

**Supplementary Figure 10 | Overview of DNA-PAINT images used for quantification in Fig. 3d. 662 6BS structures are shown.**  
Scale bar: 500 nm

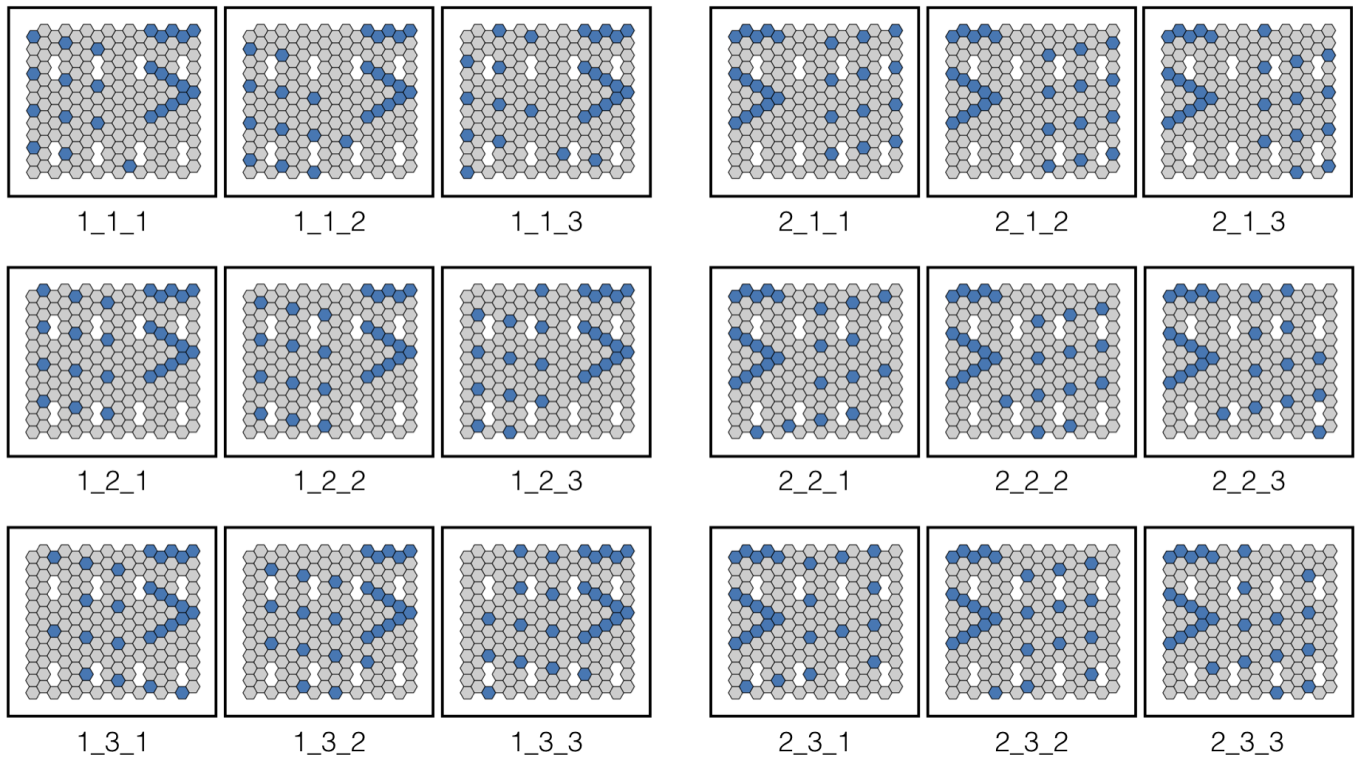

**Supplementary Figure 11 | Overview of 18 DNA origami structures used for the heatmap in Fig. 4.** The origami is divided into two sides, containing an orientation marker (arrow pattern) and staple positions to be probed.

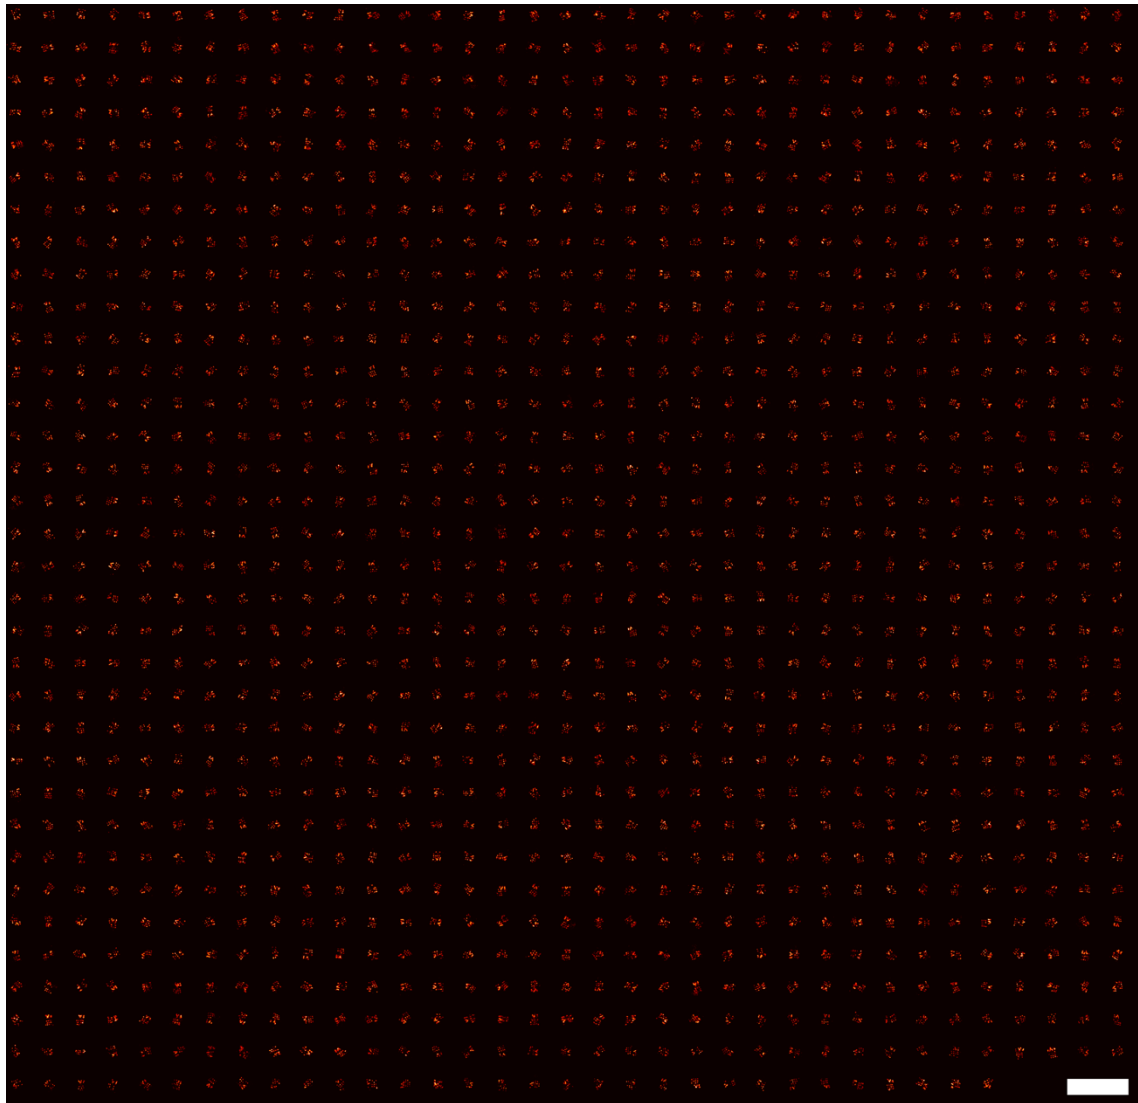

**Supplementary Figure 12 | Overview of DNA-PAINT images used for quantification in Fig. 4, Dataset 1.** 1186 structures are shown. The measurement contains all 18 origami structures. Scale bar: 500 nm

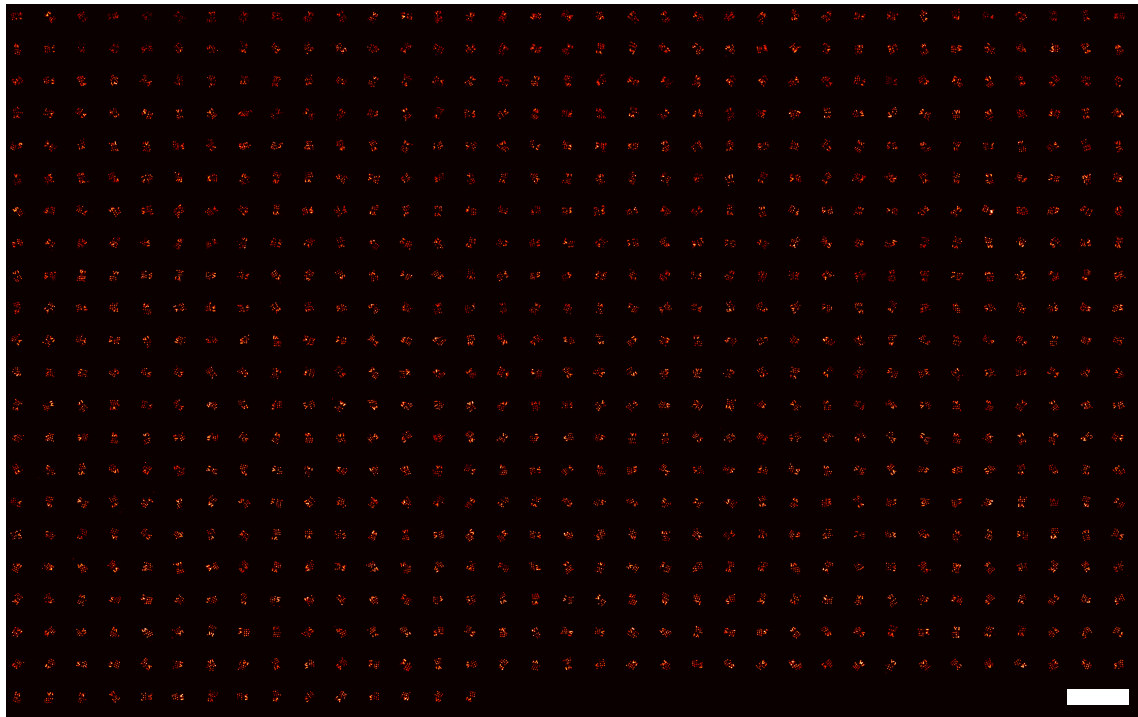

**Supplementary Figure 13 | Overview of DNA-PAINT images used for quantification in Fig. 4, Dataset 2.** 750 structures are shown. The measurement contains all 18 origami structures. Scale bar, 500 nm.

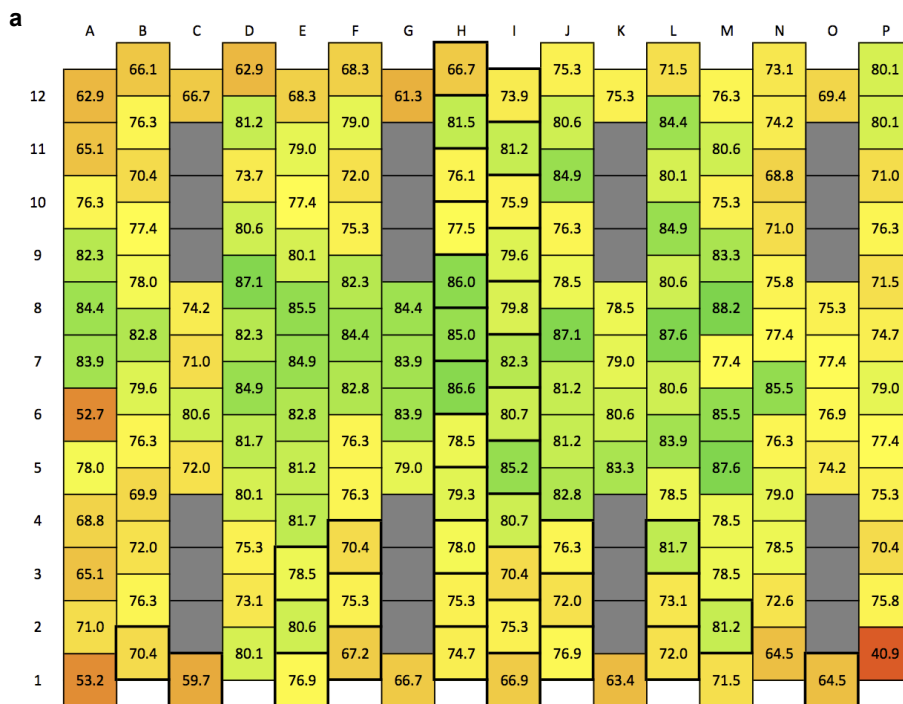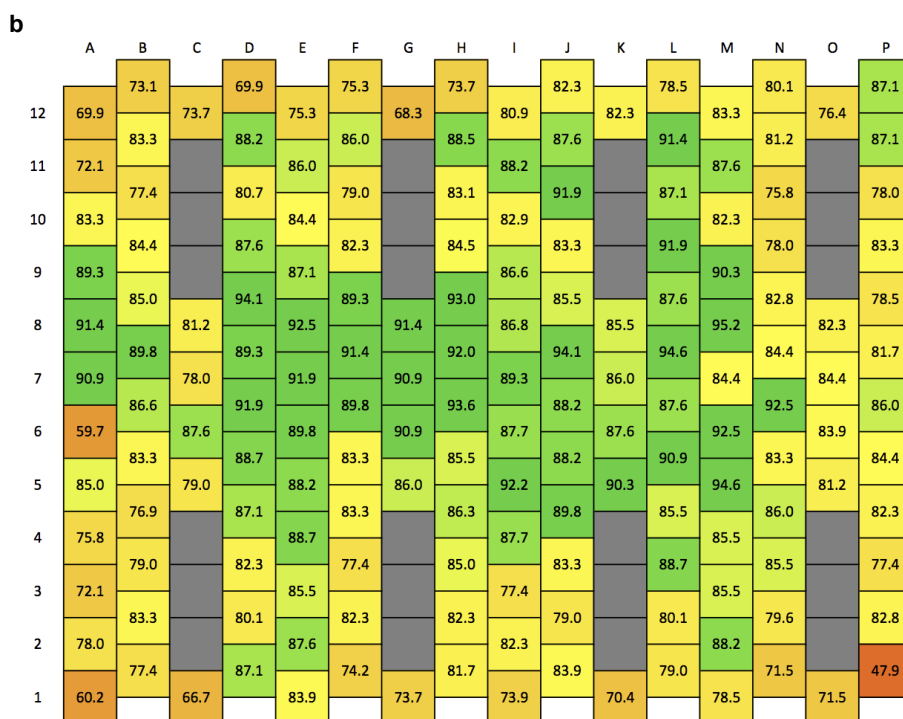

**Supplementary Figure 14 | Detection and incorporation heatmap.** **a**, The heatmap shows detection values for each probed position. **b**, The detection values can be translated to incorporation values by adding an offset of 7 % (as determined to be the 3'-error (see Figure 2) to generate an incorporation heatmap.

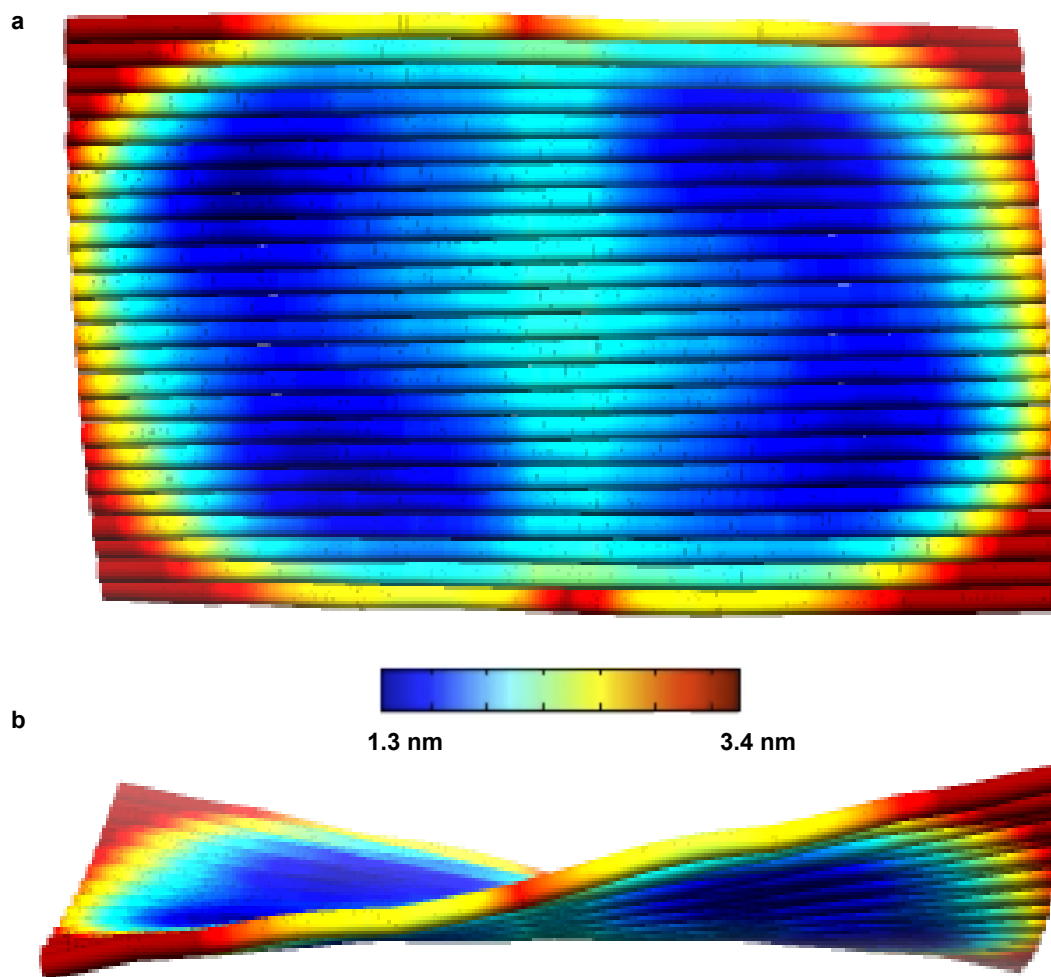

**Supplementary Figure 15 | CanDo simulation of RMS fluctuations.** **a**, Top view. The CanDo simulations show little thermal fluctuations in the center of the rectangular structure. Fluctuations with the highest magnitude can be found at the corners and edges. **b**, Side view. The side view shows the twisting of the DNA origami structure.

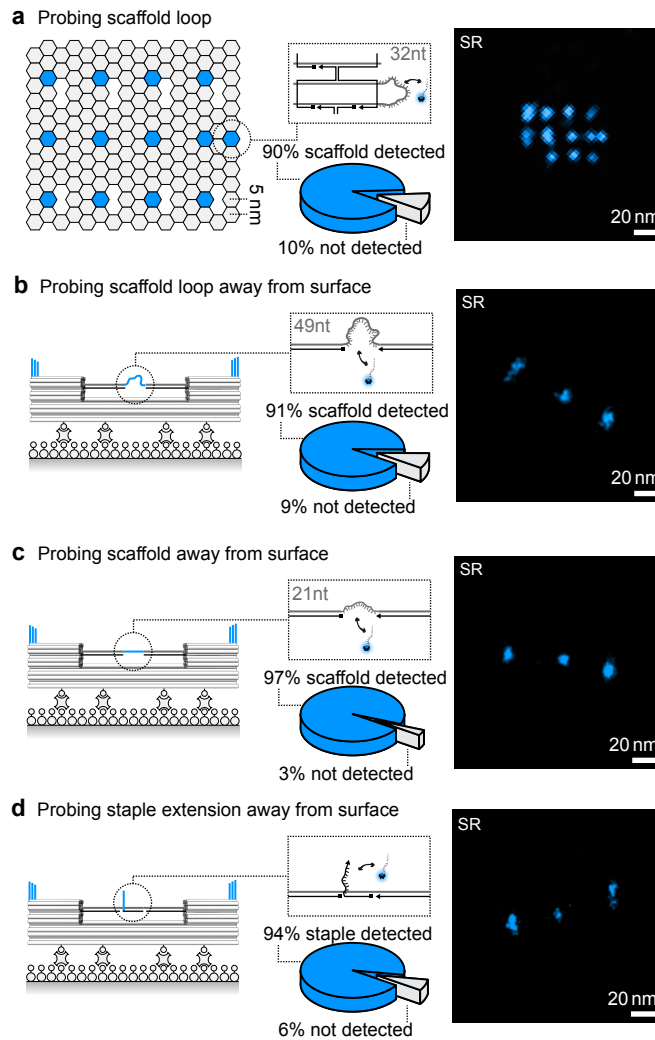

**Supplementary Figure 16 | Scaffold and staple detection experiments.** **a**, Probing the scaffold loop close to the surface yields a 90% detection efficiency. **b**, Probing a scaffold stretch (49 nt, similar to the loop of the flat origami) away from the surface yields a 91% detection efficiency. **c**, Probing a shorter scaffold stretch (21 nt, more ideally accessible) away from the surface yields a 97% detection efficiency. **d**, Probing a staple extension away from the surface yields a 94% detection efficiency.

### Supplementary Table 1 | Fit of Michaelis-Menten saturation curve

| Name          | Value                         | Standard Error |
|---------------|-------------------------------|----------------|
| Formula       | $y = V_{max} * x / (K_m + x)$ |                |
| Adj. R-Square | 0.9805                        |                |
| Vmax          | 83.13349                      | 0.39929        |
| Km            | 1.47056                       | 0.11358        |

**Supplementary Table 2 | Overview of related studies and their incorporation values.** For (1) and (2) we estimated the incorporated for a single staple by considering the decay in 6 steps. For (1) this was from 100% to 74%, for (2) to 42%. For (3) we estimated the incorporation with the given probability of 98.7% that a particle is present being bound to three strands and backcalculation to one strand.

| Reference              | Structure and attachment     | Incorporation |
|------------------------|------------------------------|---------------|
| Jungmann et al. 2010   | Streptavidin/Biotin          | 83%           |
| Derr et al. 2012       | Motor Protein                | 80%           |
| Tomov et al. 2013      | Hairpin Walker               | 95% (1)       |
| Voigt et al. 2010      | Streptavidin/Biotin          | 84%           |
| Liber et al. 2015      | Walker                       | 86.50% (2)    |
| Guer et al. 2016       | Gold Nanoparticle Attachment | 76.50% (3)    |
| Jungmann et al. 2016   | qPAINT                       | 85%           |
| Chatterjee et al. 2017 | DNA Computing                | 92.5%/83%     |



**Supplementary Table 3 | Super-resolution data properties**

| Measurement      | NeNA                                                                               |
|------------------|------------------------------------------------------------------------------------|
| Fig 2: Atto647N  | 2.256 nm                                                                           |
| Fig 2: Cy3b      | 1.616 nm                                                                           |
| Fig 3: Annealing | 10min: 1.573 nm<br>1h: 1.508 nm<br>3h: 1.664 nm<br>12h: 1.534 nm<br>3d: 1.768 nm   |
| Fig 3: Excess    | 10x: 2.752 nm<br>20x: 2.144 nm<br>50x: 2.112 nm<br>100x: 2.72 nm<br>523x: 2.096 nm |
| Fig 3: 3 BS      | 4.017 nm                                                                           |
| Fig 3: 6 BS      | 1.365 nm                                                                           |
| Fig 4: Heatmap   | 1.495 nm / 1.469 nm                                                                |

## Supplementary Table 4 | Imaging conditions

| Figure | Name                                  | Origami | Excess | Folding Buffer                  | Folding Ramp | Purification   | c(Origami)    | Buffer      | Imager | c(Img)-nM | Laserpower | Power density (kW/cm <sup>2</sup> ) | Int (ms)      | Frames   | Camera   | ROI (px) |     |   |   |
|--------|---------------------------------------|---------|--------|---------------------------------|--------------|----------------|---------------|-------------|--------|-----------|------------|-------------------------------------|---------------|----------|----------|----------|-----|---|---|
| 1 d    | Simulations                           | 20nm    | -      | -                               | -            | -              | 50 structures | -           | -      | 5         | -          | 1.5                                 | 200           | 15000    | 160nm Px | 128      |     |   |   |
| 2      | 5' - 3' Experiment                    | 20nm    | 100    | 1x FB                           | 80-4, 10min  | Gel            | 17/100        | B+/PPT      | P1*    | 1         | -          | 561 nm @ ~1.37                      | 300           | 15000    | EMCCD    | 256      |     |   |   |
| 2      | 5' - 3' Experiment                    | 20nm    | 100    | 1x FB                           | 80-4, 10min  | Gel            | 17/100        | B+/PPT      | P9     | 1         | -          | 640 nm @ ~1.97                      | 300           | 15000    | EMCCD    | 256      |     |   |   |
| 3      | Folding Ramps                         | Arrow   | 100    | 1x FB                           | 80-4, 10min  | none           | 2/100         | O+/PPT      | P1     | 5         | 100        | 561 nm ~4.2                         | 200           | 15000    | sCMOS    | 512      |     |   |   |
|        |                                       |         | 100    | 1x FB                           | 80-4, 1h     | none           | 2/100         | O+/PPT      | P1     | 5         | 100        | 561 nm ~4.2                         | 200           | 15000    | sCMOS    | 512      |     |   |   |
|        |                                       |         | 100    | 1x FB                           | 80-4, 3h     | none           | 2/100         | O+/PPT      | P1     | 5         | 100        | 561 nm ~4.2                         | 200           | 15000    | sCMOS    | 512      |     |   |   |
|        |                                       |         | 100    | 1x FB                           | 80-4, 12h    | none           | 2/100         | O+/PPT      | P1     | 5         | 100        | 561 nm ~4.2                         | 200           | 15000    | sCMOS    | 512      |     |   |   |
|        |                                       |         | 100    | 1x FB                           | 80-4, 3d     | none           | 2/100         | O+/PPT      | P1     | 5         | 100        | 561 nm ~4.2                         | 200           | 15000    | sCMOS    | 512      |     |   |   |
| 3      | Excess                                | 20nm    | 10     | 1x FB                           | -            | PEG            | 3/100         | O+          | P1     | 5         | 70         | 561 nm @ ~2.9                       | 300           | 7500     | EMCCD    | 256      |     |   |   |
|        |                                       |         | 20     | 1x FB                           | -            | PEG            | 3/100         | O+          | P1     | 5         | 70         | 561 nm @ ~2.9                       | 300           | 7500     | EMCCD    | 256      |     |   |   |
|        |                                       |         | 50     | 1x FB                           | 60to4,3h     | PEG            | 2/100         | O+          | P1     | 5         | 70         | 561 nm @ ~2.9                       | 300           | 7500     | EMCCD    | 256      |     |   |   |
|        |                                       |         | 100    | 1x FB                           | -            | PEG            | 2/100         | O+          | P1     | 5         | 70         | 561 nm @ ~2.9                       | 300           | 7500     | EMCCD    | 256      |     |   |   |
|        |                                       |         | 523.3  | 1x FB                           | -            | PEG            | 2/100         | O+          | P1     | 5         | 70         | 561 nm @ ~2.9                       | 300           | 7500     | EMCCD    | 256      |     |   |   |
| 3d     | Simulations                           | 20nm    | -      | -                               | -            | 50 structures  | -             | -           | 5      | -         | 1.5        | 200                                 | 15000         | 160nm Px | 128      |          |     |   |   |
| 4      | Heatmap                               | -       | 1_1_1  | 100                             | 1x FB        | -              | none          | -           | -      | -         | -          | -                                   | -             | -        | -        | -        | -   |   |   |
|        |                                       |         | 1_1_2  | 100                             | 1x FB        | -              | none          | -           | -      | -         | -          | -                                   | -             | -        | -        | -        | -   | - |   |
|        |                                       |         | 1_1_3  | 100                             | 1x FB        | -              | none          | -           | -      | -         | -          | -                                   | -             | -        | -        | -        | -   | - |   |
|        |                                       |         | 1_2_1  | 100                             | 1x FB        | -              | none          | -           | -      | -         | -          | -                                   | -             | -        | -        | -        | -   | - |   |
|        |                                       |         | 1_2_2  | 100                             | 1x FB        | -              | none          | -           | -      | -         | -          | -                                   | -             | -        | -        | -        | -   | - |   |
|        |                                       |         | 1_2_3  | 100                             | 1x FB        | -              | none          | -           | -      | -         | -          | -                                   | -             | -        | -        | -        | -   | - | - |
|        |                                       |         | 1_3_1  | 100                             | 1x FB        | -              | none          | -           | -      | -         | -          | -                                   | -             | -        | -        | -        | -   | - |   |
|        |                                       |         | 1_3_2  | 100                             | 1x FB        | -              | none          | -           | -      | -         | -          | -                                   | -             | -        | -        | -        | -   | - | - |
|        |                                       |         | 1_3_3  | 100                             | 1x FB        | -              | none          | -           | -      | -         | -          | -                                   | -             | -        | -        | -        | -   | - | - |
|        |                                       |         | 2_1_1  | 100                             | 1x FB        | 60to4,3h       | none          | 18x 0.2/100 | O+/PPT | P1        | 2          | 100                                 | 561 nm @ ~4.2 | ###      | ##       | CMOS     | ### |   |   |
|        |                                       |         | 2_1_2  | 100                             | 1x FB        | -              | none          | -           | -      | -         | -          | -                                   | -             | -        | -        | -        | -   | - |   |
|        |                                       |         | 2_1_3  | 100                             | 1x FB        | -              | none          | -           | -      | -         | -          | -                                   | -             | -        | -        | -        | -   | - |   |
|        |                                       |         | 2_2_1  | 100                             | 1x FB        | -              | none          | -           | -      | -         | -          | -                                   | -             | -        | -        | -        | -   | - |   |
|        |                                       |         | 2_2_2  | 100                             | 1x FB        | -              | none          | -           | -      | -         | -          | -                                   | -             | -        | -        | -        | -   | - |   |
|        |                                       |         | 2_2_3  | 100                             | 1x FB        | -              | none          | -           | -      | -         | -          | -                                   | -             | -        | -        | -        | -   | - |   |
|        |                                       |         | 2_3_1  | 100                             | 1x FB        | -              | none          | -           | -      | -         | -          | -                                   | -             | -        | -        | -        | -   | - |   |
|        |                                       |         | 2_3_2  | 100                             | 1x FB        | -              | none          | -           | -      | -         | -          | -                                   | -             | -        | -        | -        | -   | - |   |
| 2_3_3  | 100                                   | 1x FB   | -      | none                            | -            | -              | -             | -           | -      | -         | -          | -                                   | -             | -        | -        |          |     |   |   |
| SI     | Magnesium                             | Arrow   | 100    | 1x FB (8mM MgCl <sub>2</sub> )  | -            | none           | 2/100         | O+/PPT      | P1     | 5         | 100        | 561 nm ~4.2                         | 200           | 15000    | sCMOS    | 512      |     |   |   |
|        |                                       |         | 100    | 1x FB (10mM MgCl <sub>2</sub> ) | -            | none           | 2/100         | O+/PPT      | P1     | 5         | 100        | 561 nm ~4.2                         | 200           | 15000    | sCMOS    | 512      |     |   |   |
|        |                                       |         | 100    | 1x FB (12mM MgCl <sub>2</sub> ) | 60to4,3h     | none           | 2/100         | O+/PPT      | P1     | 5         | 100        | 561 nm ~4.2                         | 200           | 15000    | sCMOS    | 512      |     |   |   |
|        |                                       |         | 100    | 1x FB (14mM MgCl <sub>2</sub> ) | -            | none           | 2/100         | O+/PPT      | P1     | 5         | 100        | 561 nm ~4.2                         | 200           | 15000    | sCMOS    | 512      |     |   |   |
|        |                                       |         | 100    | 1x FB (16mM MgCl <sub>2</sub> ) | -            | none           | 2/100         | O+/PPT      | P1     | 5         | 100        | 561 nm ~4.2                         | 200           | 15000    | sCMOS    | 512      |     |   |   |
| SI 16  | Scaffold Loop (a) Force Clamp (b,c,d) | 20nm    | 100    | 1x FB                           | 80-4, 10min  | Gel            | 17/100        | B+/PPT      | P9     | 1         | -          | 640 nm @ ~1.97                      | 300           | 15000    | EMCCD    | 256      |     |   |   |
|        |                                       |         | 100    | 1x FB                           | -            | Refer to Paper | Gel           | 500pM       | B+/PPT | P1        | 5          | 70                                  | 561 nm @ ~2.9 | 200      | 15000    | sCMOS    | 512 |   |   |

## Supplementary Table 5 | Used DNA-PAINT sequences

| Shortname | Docking sequence | Imager sequence     | Experiment |
|-----------|------------------|---------------------|------------|
| P1        | TT ATACATCTA     | CTAGATGTAT-Cy3b     | Fig 3/4    |
| P1*       | TT ATACATCTA     | Cy3b-CATCCTAATT     | Fig 2      |
| P9        | TT AATTAGGAT     | CATCCTAATT-Atto647N | Fig 2      |

## Supplementary Table 6 | List of core staples

| Position | Name                | Sequence                                |
|----------|---------------------|-----------------------------------------|
| A1       | 21 [32] 23 [31] BLK | TTTTCACTCAAAGGGCGAAAAACCATCACC          |
| B1       | 23 [32] 22 [48] BLK | CAAATCAAGTTTTTGGGGTCGAAACGTGGA          |
| C1       | 21 [56] 23 [63] BLK | AGCTGATTGCCCTCAGAGTCCACTATTAAAGGGTGCCGT |
| D1       | 23 [64] 22 [80] BLK | AAAGCACTAAATCGGAACCCATATCCAGTT          |
| E1       | 21 [96] 23 [95] BLK | AGCAAGCGTAGGGTTGAGTGTGTAGGGAGCC         |

|    |                       |                                                 |
|----|-----------------------|-------------------------------------------------|
| F1 | 23 [96] 22 [112] BLK  | CCCGATTTAGAGCTTGACGGGAAAAAGAATA                 |
| G1 | 21 [120] 23 [127] BLK | CCCAGCAGGCGAAAAATCCCTTATAAATCAAGCCGGCG          |
| H1 | 21 [160] 22 [144] BLK | TCAATATCGAACCTCAAATATCAATTCCGAAA                |
| I1 | 23 [128] 23 [159] BLK | AACGTGGCGAGAAAGGAAGGAAACCAGTAA                  |
| J1 | 23 [160] 22 [176] BLK | TAAAAGGGACATCTGGCCAACAAAGCATC                   |
| K1 | 21 [184] 23 [191] BLK | TCAACAGTTGAAAGGAGCAAATGAAAAATCTAGAGATAGA        |
| L1 | 23 [192] 22 [208] BLK | ACCCTTCTGACCTGAAAGCGTAAGACGCTGAG                |
| M1 | 21 [224] 23 [223] BLK | CTTAGGGCCTGCAACAGTGCCAATACGTG                   |
| N1 | 23 [224] 22 [240] BLK | GCACAGACAATATTTTTGAATGGGGTCAGTA                 |
| O1 | 21 [248] 23 [255] BLK | AGATTAGAGCCGTCAAAAACAGAGGTGAGGCCATTAGT          |
| P1 | 23 [256] 22 [272] BLK | CTTTAATGCGCGAACTGATAGCCCCACCAG                  |
| A2 | 19 [32] 21 [31] BLK   | GTCGACTTCGGCCAACGCGGGGGTTTTTC                   |
| B2 | 22 [47] 20 [48] BLK   | CTCCAACGCAGTGAGACGGGCAACCAGCTGCA                |
| D2 | 22 [79] 20 [80] BLK   | TGGAACAACCGCCTGGCCCTGAGGCCCGCT                  |
| E2 | 19 [96] 21 [95] BLK   | CTGTGTGATTGCGTTGCGCTCACTAGAGTTGC                |
| F2 | 22 [111] 20 [112] BLK | GCCCAGAGTCCACGCTGGTTTTGCAGCTAACT                |
| H2 | 19 [160] 20 [144] BLK | GCAATTCACATATCCTGATTATCAAAGTGTA                 |
| I2 | 22 [143] 21 [159] BLK | TCGGCAAATCCTGTTTGATGGTGGACCCTCAA                |
| J2 | 22 [175] 20 [176] BLK | ACCTTGCTTGGTCAGTTGGCAAAGAGCGGA                  |
| L2 | 22 [207] 20 [208] BLK | AGCCAGCAATTGAGGAAGGTTATCATCATTTT                |
| M2 | 19 [224] 21 [223] BLK | CTACCATAGTTTGAGTAACATTTAAAATAT                  |
| N2 | 22 [239] 20 [240] BLK | TTAACACCAGCACTAACAACTAATCGTTATTA                |
| P2 | 22 [271] 20 [272] BLK | CAGAAGATTAGATAATACATTTGTCGACAA                  |
| A3 | 17 [32] 19 [31] BLK   | TGCATCTTTCCCAGTCACGACGGCCTGCAG                  |
| B3 | 20 [47] 18 [48] BLK   | TTAATGAACTAGAGGATCCCCGGGGGGTAACG                |
| D3 | 20 [79] 18 [80] BLK   | TTCCAGTCGTAATCATGGTCATAAAAGGGG                  |
| E3 | 17 [96] 19 [95] BLK   | GCTTTCCGATTACGCCAGCTGGCGGCTGTTC                 |
| F3 | 20 [111] 18 [112] BLK | CACATTTAAAATTGTTATCCGCTCATGCGGGCC               |
| H3 | 17 [160] 18 [144] BLK | AGAAAACAAAGAAGATGATGAAACAGGCTGCG                |
| I3 | 20 [143] 19 [159] BLK | AAGCCTGGTACGAGCCGGAAGCATAGATGATG                |
| J3 | 20 [175] 18 [176] BLK | ATTATCATTCAATATAATCCTGACAATTAC                  |
| L3 | 20 [207] 18 [208] BLK | GCGGAACATCTGAATAATGGAAGGTACAAAAT                |
| M3 | 17 [224] 19 [223] BLK | CATAAATCTTTGAATACCAAGTGTTAGAAC                  |
| N3 | 20 [239] 18 [240] BLK | ATTTTAAAATCAAATATTTTGCACGATTCCG                 |
| P3 | 20 [271] 18 [272] BLK | CTCGTATTAGAAATTGCGTAGATACAGTAC                  |
| A4 | 15 [32] 17 [31] BLK   | TAATCAGCGGATTGACCGTAATCGTAACCG                  |
| B4 | 18 [47] 16 [48] BLK   | CCAGGGTTGCCAGTTTGGGGGACCCGTGGGA                 |
| C4 | 15 [64] 18 [64] BLK   | GTATAAGCCAACCCGTGCGATTCTGACGACAGTATCGGCCGCAAGCG |

|    |                       |                                                  |
|----|-----------------------|--------------------------------------------------|
| D4 | 18 [79] 16 [80] BLK   | GATGTGCTTCAGGAAGATCGCACAAATGTGA                  |
| E4 | 15 [96] 17 [95] BLK   | ATATTTTGGCTTTCATCAACATATCCAGCCA                  |
| F4 | 18 [111] 16 [112] BLK | TCTTCGCTGCACCGCTTCTGGTGCGGCCTTCC                 |
| G4 | 15 [128] 18 [128] BLK | TAAATCAAAATAATTCGCGTCTCGGAAACCAGGCAAAGGGAAGG     |
| H4 | 15 [160] 16 [144] BLK | ATCGCAAGTATGTAAATGCTGATGATAGGAAC                 |
| I4 | 18 [143] 17 [159] BLK | CAACTGTTGCGCCATTCGCCATCAAACATCA                  |
| J4 | 18 [175] 16 [176] BLK | CTGAGCAAAAATAATTACATTTTGGGTTA                    |
| K4 | 15 [192] 18 [192] BLK | TCAAATATAACCTCCGGCTTAGGTAACAATTCATTTGAAGGCGAATT  |
| L4 | 18 [207] 16 [208] BLK | CGCGCAGATTACCTTTTTTAATGGGAGAGACT                 |
| M4 | 15 [224] 17 [223] BLK | CCTAAATCAAAATCATAGGTCTAAACAGTA                   |
| N4 | 18 [239] 16 [240] BLK | CCTGATTGCAATATATGTGAGTGATCAATAGT                 |
| O4 | 15 [256] 18 [256] BLK | GTGATAAAAAGACGCTGAGAAGAGATAACCTTGCTTCTGTTCGGGAGA |
| P4 | 18 [271] 16 [272] BLK | CTTTTACAAAATCGTCGCTATTAGCGATAG                   |
| A5 | 13 [32] 15 [31] BLK   | AACGCAAAATCGATGAACGGTACCGGTTGA                   |
| B5 | 16 [47] 14 [48] BLK   | ACAAACGGAAAAGCCCCAAAACACTGGAGCA                  |
| C5 | 13 [64] 15 [63] BLK   | TATATTTTGTTCATTCGCTGAGAGTGGAAGATT                |
| D5 | 16 [79] 14 [80] BLK   | GCGAGTAAAAATATTTAAATTTGTTACAAAG                  |
| E5 | 13 [96] 15 [95] BLK   | TAGGTAAACTATTTTTGAGAGATCAAACGTTA                 |
| F5 | 16 [111] 14 [112] BLK | TGTAGCCATTTAAATTCGCATTAATGCCGGA                  |
| G5 | 13 [128] 15 [127] BLK | GAGACAGCTAGCTGATAAATTAATTTTTGT                   |
| H5 | 13 [160] 14 [144] BLK | GTAATAAGTTAGGCAGAGGCATTTATGATATT                 |
| I5 | 16 [143] 15 [159] BLK | GCCATCAAGCTCATTTTTTAACCACAAATCCA                 |
| J5 | 16 [175] 14 [176] BLK | TATAACTAACAAAAGAACGCGAGAACGCCAA                  |
| K5 | 13 [192] 15 [191] BLK | GTAAAGTAATCGCCATATTTAACAAAACCTTTT                |
| L5 | 16 [207] 14 [208] BLK | ACCTTTTTATTTTAGTTAATTTTCATAGGGCTT                |
| M5 | 13 [224] 15 [223] BLK | ACAACATGCCAACGCTCAACAGTCTTCTGA                   |
| N5 | 16 [239] 14 [240] BLK | GAATTTATTTAATGGTTTGAAATATTCTTACC                 |
| O5 | 13 [256] 15 [255] BLK | GTTTATCAATATGCGTTATACAAAACCGACCGT                |
| P5 | 16 [271] 14 [272] BLK | CTTAGATTTAAGGCGTTAAATAAAGCCTGT                   |
| A6 | 11 [32] 13 [31] BLK   | AACAGTTTTGTACCAAAAACATTTTATTTTC                  |
| B6 | 14 [47] 12 [48] BLK   | AACAAGAGGGATAAAAATTTTAGCATAAAGC                  |
| C6 | 11 [64] 13 [63] BLK   | GATTTAGTCAATAAAGCCTCAGAGAACCCTCA                 |
| D6 | 14 [79] 12 [80] BLK   | GCTATCAGAAATGCAATGCCTGAATTAGCA                   |
| E6 | 11 [96] 13 [95] BLK   | AATGGTCAACAGGCAAGGCAAAGAGTAATGTG                 |
| F6 | 14 [111] 12 [112] BLK | GAGGGTAGGATTCAAAAGGGTGAGACATCCAA                 |
| G6 | 11 [128] 13 [127] BLK | TTTGGGGATAGTAGTAGCATTTAAAGGCCG                   |
| H6 | 11 [160] 12 [144] BLK | CCAATAGCTCATCGTAGGAATCATGGCATCAA                 |
| I6 | 14 [143] 13 [159] BLK | CAACCGTTTCAAATCACCATCAATTCGAGCCA                 |

|    |                       |                                           |
|----|-----------------------|-------------------------------------------|
| J6 | 14 [175] 12 [176] BLK | CATGTAATAGAATATAAAAGTACCAAGCCGT           |
| K6 | 11 [192] 13 [191] BLK | TATCCGGTCTCATCGAGAACAAGCGACAAAAG          |
| L6 | 14 [207] 12 [208] BLK | AATTGAGAATTCTGTCCAGACGACTAAACCAA          |
| M6 | 11 [224] 13 [223] BLK | GCGAACCTCCAAGAACGGGTATGACAATAA            |
| N6 | 14 [239] 12 [240] BLK | AGTATAAAGTTCAGCTAATGCAGATGTCTTTC          |
| O6 | 11 [256] 13 [255] BLK | GCCTTAAACCAATCAATAATCGGCACGCGCCT          |
| P6 | 14 [271] 12 [272] BLK | TTAGTATCACAATAGATAAGTCCACGAGCA            |
| A7 | 9 [32] 11 [31] BLK    | TTACCCCAACATGTTTTAAATTTCCATAT             |
| B7 | 12 [47] 10 [48] BLK   | TAAATCGGGATTCCAATTCGCGATATAATG            |
| C7 | 9 [64] 11 [63] BLK    | CGGATTGCAGAGCTTAATTGCTGAAACGAGTA          |
| D7 | 12 [79] 10 [80] BLK   | AAATTAAGTTGACCATTAGATACTTTTGCG            |
| E7 | 9 [96] 11 [95] BLK    | CGAAAGACTTTGATAAGAGGTCATATTTGCGA          |
| F7 | 12 [111] 10 [112] BLK | TAAATCATATAACCTGTTTAGCTAACCTTTAA          |
| G7 | 9 [128] 11 [127] BLK  | GCTTCAATCAGGATTAGAGAGTTATTTTCA            |
| H7 | 9 [160] 10 [144] BLK  | AGAGAGAAAAAATGAAAATAGCAAGCAAAC            |
| I7 | 12 [143] 11 [159] BLK | TTCTACTACGCGAGCTGAAAAGGTTACCGCGC          |
| J7 | 12 [175] 10 [176] BLK | TTTTATTTAAGCAAATCAGATATTTTTTGT            |
| K7 | 9 [192] 11 [191] BLK  | TTAGACGGCCAAATAAGAAACGATAGAAGGCT          |
| L7 | 12 [207] 10 [208] BLK | GTACCGCAATTCTAAGAACGCGAGTATTATTT          |
| M7 | 9 [224] 11 [223] BLK  | AAAGTCACAAAATAAACAGCCAGCGTTTTTA           |
| N7 | 12 [239] 10 [240] BLK | CTTATCATTCCCGACTTGCGGGAGCCTAATTT          |
| O7 | 9 [256] 11 [255] BLK  | GAGAGATAGAGCGTCTTTCCAGAGGTTTTGAA          |
| P7 | 12 [271] 10 [272] BLK | TGTAGAAATCAAGATTAGTTGCTCTTACCA            |
| A8 | 7 [32] 9 [31] BLK     | TTTAGGACAAATGCTTTAAACAATCAGGTC            |
| B8 | 10 [47] 8 [48] BLK    | CTGTAGCTTGACTATTATAGTCAGTTCATTGA          |
| C8 | 7 [56] 9 [63] BLK     | ATGCAGATACATAACGGGAATCGTCATAAATAAAGCAAAG  |
| D8 | 10 [79] 8 [80] BLK    | GATGGCTTATCAAAAAGATTAAGAGCGTCC            |
| E8 | 7 [96] 9 [95] BLK     | TAAGAGCAAATGTTTAGACTGGATAGGAAGCC          |
| F8 | 10 [111] 8 [112] BLK  | TTGCTCCTTTCAAATATCGCGTTTGAGGGGGT          |
| G8 | 7 [120] 9 [127] BLK   | CGTTTACCAGACGACAAAGAAGTTTTGCCATAAATCGA    |
| H8 | 7 [160] 8 [144] BLK   | TTATTACGAAGAAGTGGCATGATTGCGAGAGG          |
| I8 | 10 [143] 9 [159] BLK  | CCAACAGGAGCGAACCAGACCGGAGCCTTTAC          |
| J8 | 10 [175] 8 [176] BLK  | TTAACGTCTAACATAAAAACAGGTAACGGA            |
| K8 | 7 [184] 9 [191] BLK   | CGTAGAAAATACATACCGAGGAAAACGCAATAAGAAGCGCA |
| L8 | 10 [207] 8 [208] BLK  | ATCCCAATGAGAATTAAGTGAACAGTTACCAG          |
| M8 | 7 [224] 9 [223] BLK   | AACGCAAAGATAGCCGAACAAACCCTGAAC            |
| N8 | 10 [239] 8 [240] BLK  | GCCAGTTAGAGGGTAATTGAGCGCTTTAAGAA          |
| O8 | 7 [248] 9 [255] BLK   | GTTTATTTTGTACAAATCTTACCGAAGCCCTTAATATCA   |

|     |                      |                                                  |
|-----|----------------------|--------------------------------------------------|
| P8  | 10 [271] 8 [272] BLK | ACGCTAACACCCACAAGAATTGAAAATAGC                   |
| A9  | 5 [32] 7 [31] BLK    | CATCAAGTAAACGAACTAACGAGTTGAGA                    |
| B9  | 8 [47] 6 [48] BLK    | ATCCCCCTATACCACATTCAACTAGAAAAATC                 |
| D9  | 8 [79] 6 [80] BLK    | AATACTGCCCAAAGGAATTACGTGGCTCA                    |
| E9  | 5 [96] 7 [95] BLK    | TCATTTCAGATGCGATTTTAAGAACAGGCATAG                |
| F9  | 8 [111] 6 [112] BLK  | AATAGTAAACACTATCATAACCCTCATTGTGA                 |
| H9  | 5 [160] 6 [144] BLK  | GCAAGGCCTCACCAGTAGCACCATGGGCTTGA                 |
| I9  | 8 [143] 7 [159] BLK  | CTTTTGAGATAAAAACCAAAATAAGACTCC                   |
| J9  | 8 [175] 6 [176] BLK  | ATACCCAACAGTATGTTAGCAAATTAGAGC                   |
| L9  | 8 [207] 6 [208] BLK  | AAGGAAACATAAAGGTGGCAACATTATCACCG                 |
| M9  | 5 [224] 7 [223] BLK  | TCAAGTTTCATTAAAGGTGAATATAAAAGA                   |
| N9  | 8 [239] 6 [240] BLK  | AAGTAAGCAGACACCACGGAATAATATTGACC                 |
| P9  | 8 [271] 6 [272] BLK  | AATAGCTATCAATAGAAAATCAACATTCA                    |
| A10 | 3 [32] 5 [31] BLK    | AATACGTTTGAAAGAGGACAGACTGACCTT                   |
| B10 | 6 [47] 4 [48] BLK    | TACGTTAAAGTAATCTTGACAAGAACCGAACT                 |
| D10 | 6 [79] 4 [80] BLK    | TTATACCACCAAATCAACGTAACGAACGAG                   |
| E10 | 3 [96] 5 [95] BLK    | ACACTCATCCATGTTACTTAGCCGAAAGCTGC                 |
| F10 | 6 [111] 4 [112] BLK  | ATTACCTTTGAATAAGGCTTGCCCAAATCCGC                 |
| H10 | 3 [160] 4 [144] BLK  | TTGACAGGCCACCACCAGAGCCGCGATTTGTA                 |
| I10 | 6 [143] 5 [159] BLK  | GATGGTTTGAACGAGTAGTAAATTTACCATTA                 |
| J10 | 6 [175] 4 [176] BLK  | CAGCAAAGGAAACGTCACCAATGAGCCGC                    |
| L10 | 6 [207] 4 [208] BLK  | TCACCGACGCACCGTAATCAGTAGCAGAACCG                 |
| M10 | 3 [224] 5 [223] BLK  | TTAAAGCCAGAGCCGCCACCCTCGACAGAA                   |
| N10 | 6 [239] 4 [240] BLK  | GAAATTATTGCCTTTAGCGTCAGACCGGAACC                 |
| P10 | 6 [271] 4 [272] BLK  | ACCGATTGTCGGCATTTCGGTCATAATCA                    |
| A11 | 1 [32] 3 [31] BLK    | AGGCTCCAGAGGCTTTGAGGACACGGGTAA                   |
| B11 | 4 [47] 2 [48] BLK    | GACCAACTAATGCCACTACGAAGGGGGTAGCA                 |
| C11 | 1 [64] 4 [64] BLK    | TTTATCAGGACAGCATCGGAACGACACCAACCTAAAACGAGGTCAATC |
| D11 | 4 [79] 2 [80] BLK    | GCGCAGACAAGAGGCAAAAGAATCCCTCAG                   |
| E11 | 1 [96] 3 [95] BLK    | AAACAGCTTTTTGCGGGATCGTCAACACTAAA                 |
| F11 | 4 [111] 2 [112] BLK  | GACCTGCTCTTTGACCCCCAGCGAGGGAGTTA                 |
| G11 | 1 [128] 4 [128] BLK  | TGACAACTCGTGAGGCTTGCAATTATACCAAGCGCGATGATAAA     |
| H11 | 1 [160] 2 [144] BLK  | TTAGGATTGGCTGAGACTCCTCAATAACCGAT                 |
| I11 | 4 [143] 3 [159] BLK  | TCATCGCCAACAAAGTACAACGGACGCCAGCA                 |
| J11 | 4 [175] 2 [176] BLK  | CACCAGAAAGGTTGAGGCAGGTCATGAAAG                   |
| K11 | 1 [192] 4 [192] BLK  | GCGGATAACCTATTATTCTGAAACAGACGATTGGCCTTGAAGAGCCAC |
| L11 | 4 [207] 2 [208] BLK  | CCACCCTCTATTCAAAACAAATACCTGCCTA                  |
| M11 | 1 [224] 3 [223] BLK  | GTATAGCAAACAGTTAATGCCCAATCCTCA                   |

|     |                     |                                                 |
|-----|---------------------|-------------------------------------------------|
| N11 | 4 [239] 2 [240] BLK | GCCTCCCTCAGAATGGAAAGCGCAGTAACAGT                |
| O11 | 1 [256] 4 [256] BLK | CAGGAGGTGGGGTCAGTGCCTTGAGTCTCTGAATTTACCGGAACCAG |
| P11 | 4 [271] 2 [272] BLK | AAATCACCTTCCAGTAAGCGTCAGTAATAA                  |
| A12 | 0 [47] 1 [31] BLK   | AGAAAGGAACAACCTAAAGGAATCAAAAAA                  |
| B12 | 2 [47] 0 [48] BLK   | ACGGCTACAAAAGGAGCCTTTAATGTGAGAAT                |
| C12 | 0 [79] 1 [63] BLK   | ACAACCTTCAACAGTTTCAGCGGATGTATCGG                |
| D12 | 2 [79] 0 [80] BLK   | CAGCGAACTTGCTTTCGAGGTGTGCTAA                    |
| E12 | 0 [111] 1 [95] BLK  | TAAATGAATTTTCTGTATGGGATTAATTTCTT                |
| F12 | 2 [111] 0 [112] BLK | AAGGCCGCTGATACCGATAGTTGCGACGTTAG                |
| G12 | 0 [143] 1 [127] BLK | TCTAAAGTTTTGTCGTCTTTCAGCCGACAA                  |
| H12 | 0 [175] 0 [144] BLK | TCCACAGACAGCCCTCATAGTTAGCGTAACGA                |
| I12 | 2 [143] 1 [159] BLK | ATATTCGGAACCATCGCCACGCAGAGAAGGA                 |
| J12 | 2 [175] 0 [176] BLK | TATTAAGAAGCGGGTTTTGCTCGTAGCAT                   |
| K12 | 0 [207] 1 [191] BLK | TCACCAGTACAACTACAACGCCTAGTACCAG                 |
| L12 | 2 [207] 0 [208] BLK | TTTCGGAAGTGCCGTCGAGAGGGTGAGTTTCG                |
| M12 | 0 [239] 1 [223] BLK | AGGAACCCATGTACCGTAACACTTGATATAA                 |
| N12 | 2 [239] 0 [240] BLK | GCCCGTATCCGGAATAGGTGTATCAGCCCAAT                |
| O12 | 0 [271] 1 [255] BLK | CCACCCTCATTTTCAGGGATAGCAACCGTACT                |
| P12 | 2 [271] 0 [272] BLK | GTTTTAACTTAGTACCGCCACCCAGAGCCA                  |

**Supplementary Table 7 | List of biotinylated staples**

| No | Pos | Name                     | Sequence                                  | Mod    |
|----|-----|--------------------------|-------------------------------------------|--------|
| 1  | C02 | 18 [63] 20 [56] BIOTIN   | ATTAAGTTTACCAGACTCGAATTCGGGAAACCTGTCGTGC  | 5' -BT |
| 2  | C09 | 4 [63] 6 [56] BIOTIN     | ATAAGGGAACCGGATATTCATTACGTCAGGACGTTGGGAA  | 5' -BT |
| 3  | G02 | 18 [127] 20 [120] BIOTIN | GCGATCGGCAATCCACACAACAGGTGCCTAATGAGTG     | 5' -BT |
| 4  | G09 | 4 [127] 6 [120] BIOTIN   | TTGTGTCGTGACGAGAAACACCAAATTTCAACTTTAAT    | 5' -BT |
| 5  | K02 | 18 [191] 20 [184] BIOTIN | ATTCATTTTTGTTTGGATTATACTAAGAAACCACCAGAAG  | 5' -BT |
| 6  | K09 | 4 [191] 6 [184] BIOTIN   | CACCCTCAGAAACCATCGATAGCATTGAGCCATTTGGGAA  | 5' -BT |
| 7  | O02 | 18 [255] 20 [248] BIOTIN | AACAATAACGTAAAACAGAAATAAAAAATCCTTTGCCCGAA | 5' -BT |
| 8  | O09 | 4 [255] 6 [248] BIOTIN   | AGCCACCACTGTAGCGGTTTTCAAGGGAGGGAAGGTAAA   | 5' -BT |
